# Supplementary material for: One step engineering of the small-subunit ribosomal RNA using CRISPR/Cas9
Source: PubMed Central journal article supplement (PMC4973257; doi:10.1038/srep30714), 2016-08-04
Supplement: srep30714-s1.pdf [file srep30714-s1.pdf]

## **One step engineering of the small-subunit ribosomal RNA using CRISPR/Cas9**

Krishna Kannan,<sup>1</sup> Billyana Tsvetanova,<sup>1</sup> Ray-Yuan Chuang,<sup>2</sup> Vladimir N. Noskov,<sup>2</sup> Nacyra Assad-Garcia,<sup>2</sup> Li Ma,<sup>2</sup> Clyde A. Hutchison III,<sup>2</sup> Hamilton O. Smith,<sup>1,2</sup> John I. Glass,<sup>2</sup> Charles E. Merryman,<sup>2</sup> J. Craig Venter,<sup>1,2</sup> Daniel G. Gibson,<sup>\*1,2</sup>

Affiliations:

<sup>1</sup>Synthetic Genomics, Inc., La Jolla, CA 92037

<sup>2</sup>J. Craig Venter Institute, La Jolla, CA 92037

\*Correspondence to: [dgibson@jcvl.org](mailto:dgibson@jcvl.org)

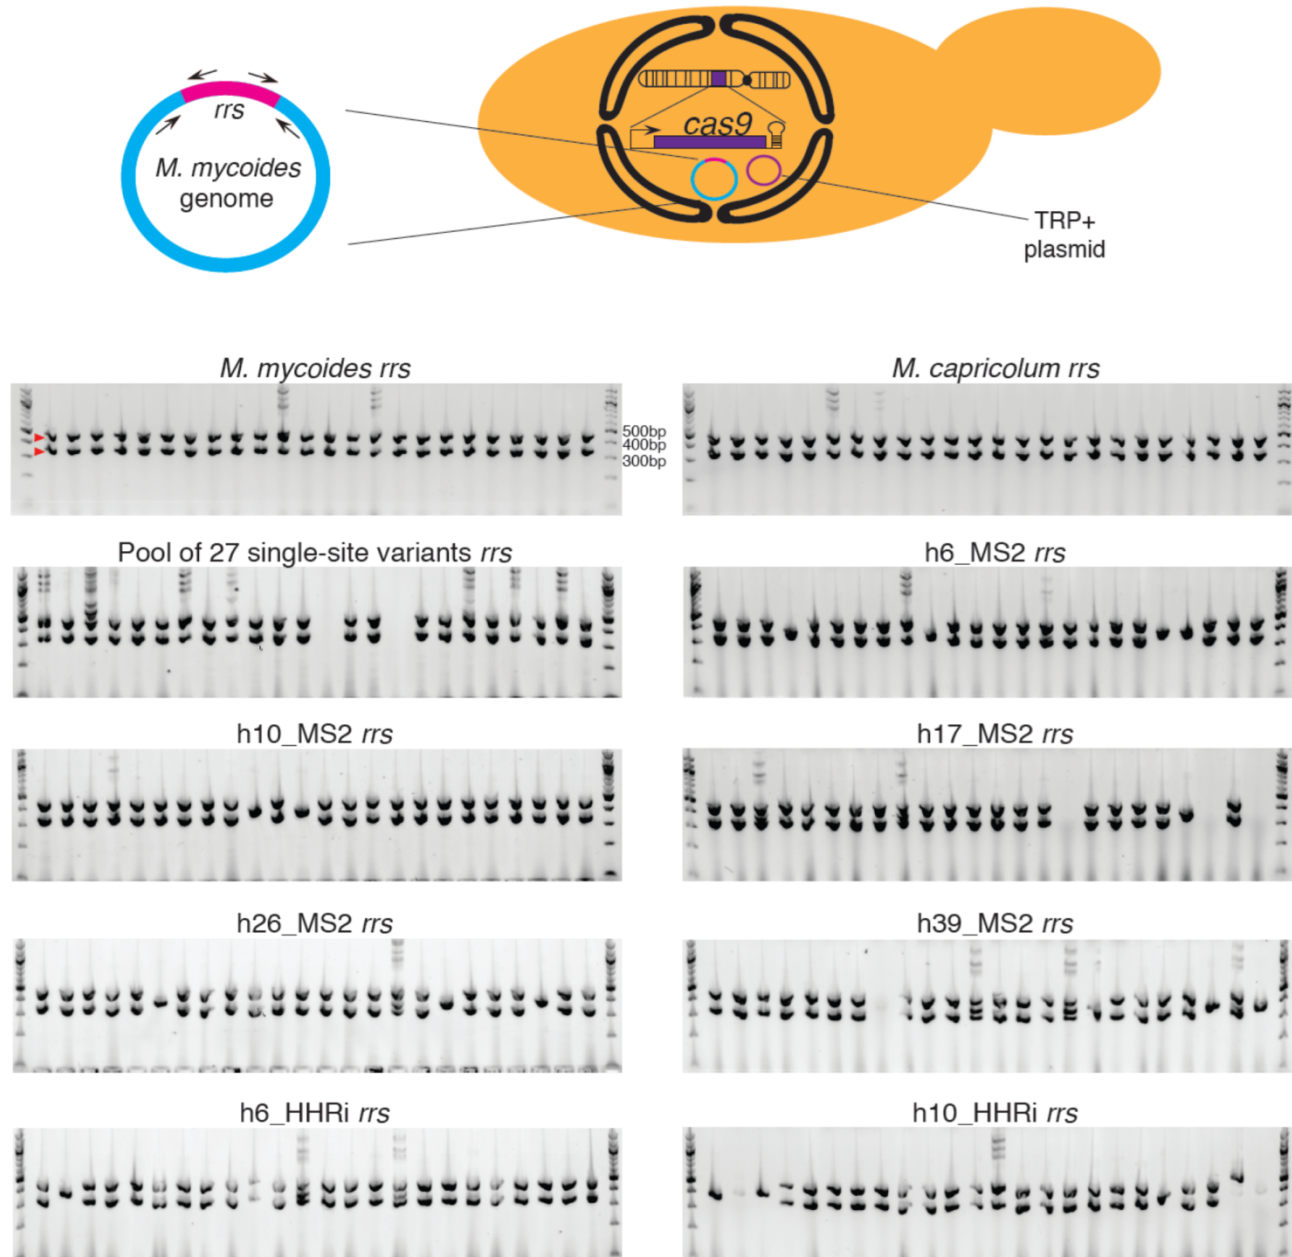

**Supplementary figure 1. Detecting *M. mycooides* genome editing event using diagnostic multiplex PCR.**

VL6-48N-Cas9 yeast strain carrying *M. mycooides*  $\Delta rrs::ura3$  genome was electroporated with two *in vitro* transcribed gRNAs (Supplementary Table 3), “empty” pYAC\_TRP1 plasmid and donor *rrs* DNA. Transformants were selected on plates lacking histidine and tryptophan and screened by multiplex PCR (Primers listed in Supplementary Table 5) for the replacement of *ura3* cassette with *rrs* donor. Data from select donor transformations (*M. mycooides* and *M. capricolum rrs* and single-site variant donors used individually or as a pool) are shown after screening 24 transformants that were patched on to selection plate lacking histidine. The expected bands are indicated by red arrows (353bp and 474bp).

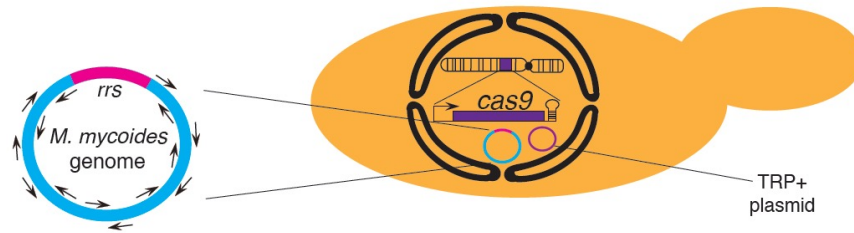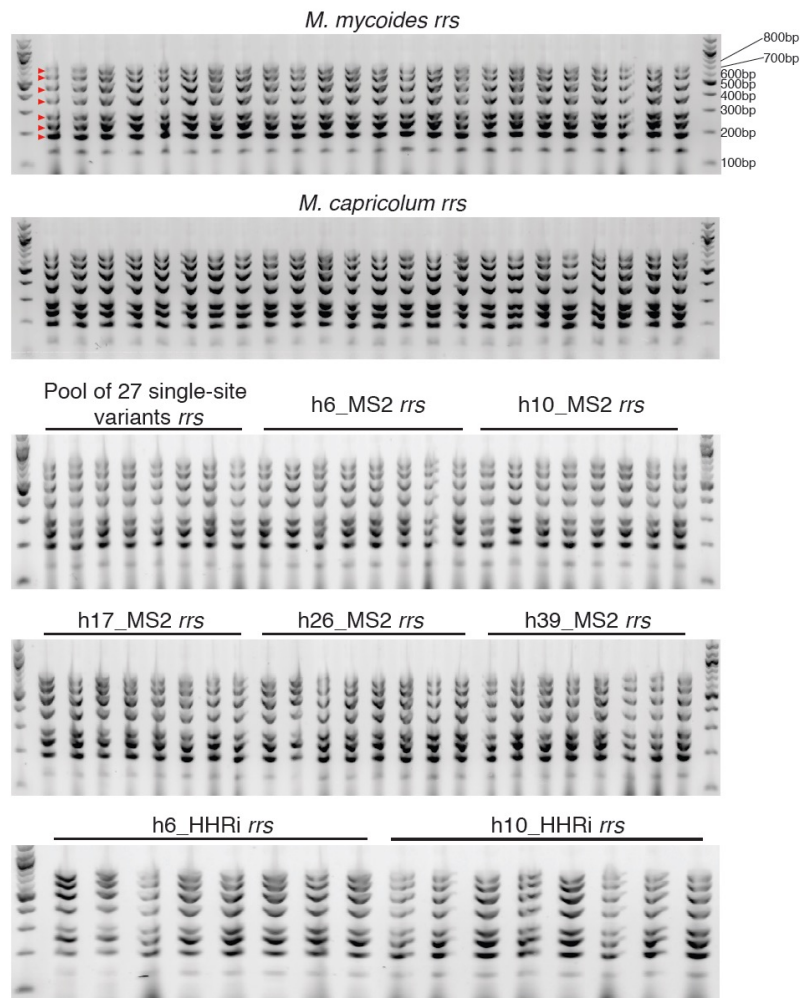

**Supplementary figure 2. Testing the integrity of the edited *M. mycooides* genome using diagnostic multiplex PCR.**

Twenty four (*M. mycooides* and *M. capricolum rrs* donors) or eight (single-site variants used individually or as a pool for donors) positive clones that were confirmed for *M. mycooides* genome editing at the  $\Delta rrs::ura3$  locus (Supplementary Fig. 1) were tested for rearrangements in within the YAC carrying the genome as a result of this editing using multi-locus multiplex PCR (Supplementary Table 4). Expected bands are indicated by red arrows.

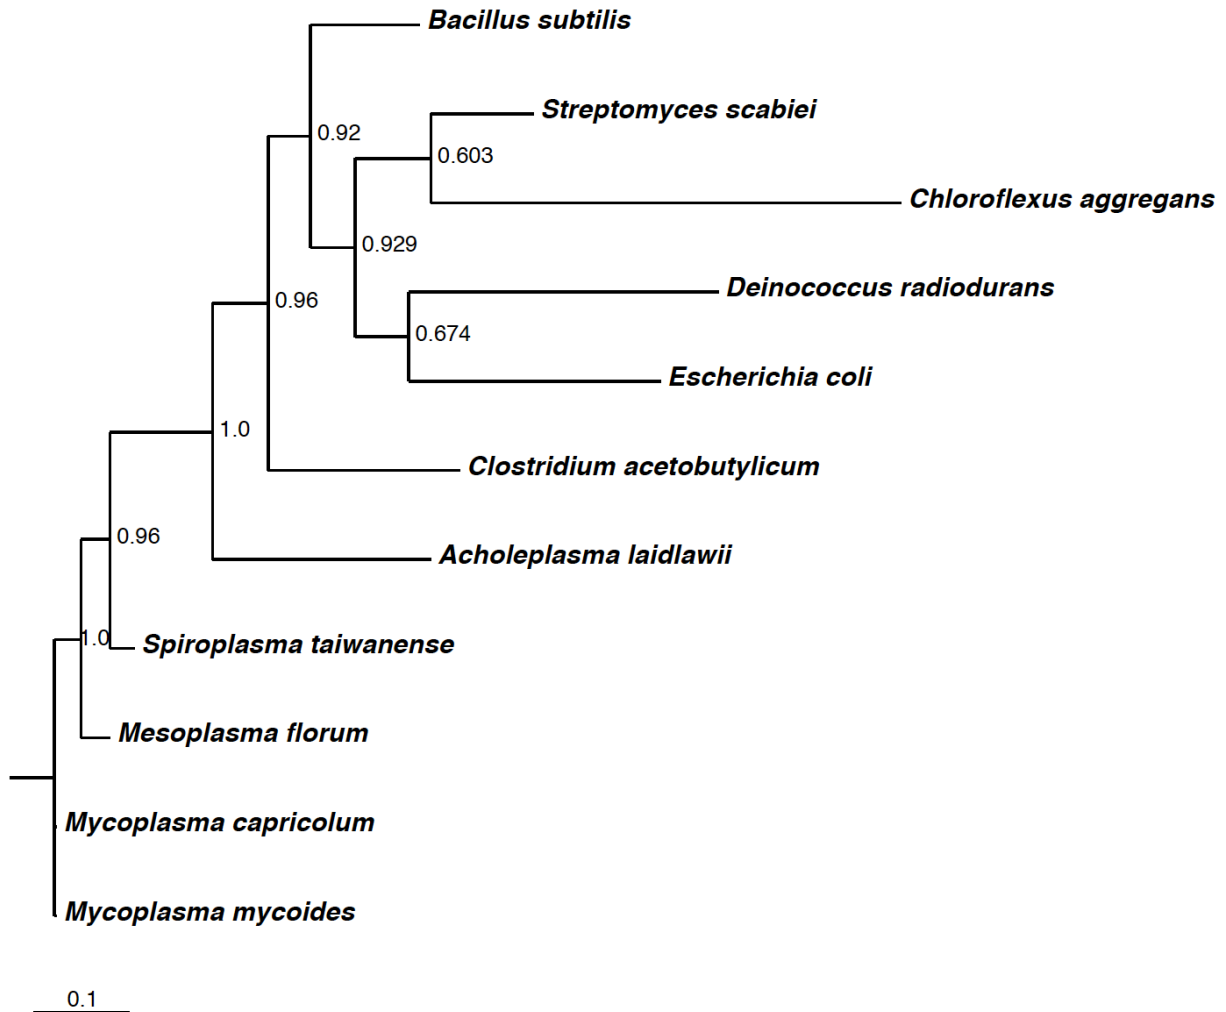

**Supplementary figure 3. Phylogenetic analysis of heterologous *rrs* that were used to replace *M. mycoides* *rrs* and test viability.**

In the *M. mycoides* genome carrying single rDNA operon, the *rrs* gene was substituted with *rrs* genes with variable phylogenetic-distances. Resulting genome was tested for viability by genome-transplantation and only *M. capricolum* *rrs*, carrying seven mutations compared to *M. mycoides* *rrs*, was able to support viability. Sequence alignment was performed using MUSCLE (<http://www.ebi.ac.uk/Tools/msa/muscle/>); phylogenetic analysis was performed using PHYML (<http://phylogeny.lirmm.fr/phylo.cgi/phylogeny.cgi>) and the tree was rendered using Phylodendron (<http://iubio.bio.indiana.edu/treeapp/treeprint-sample1.html>).

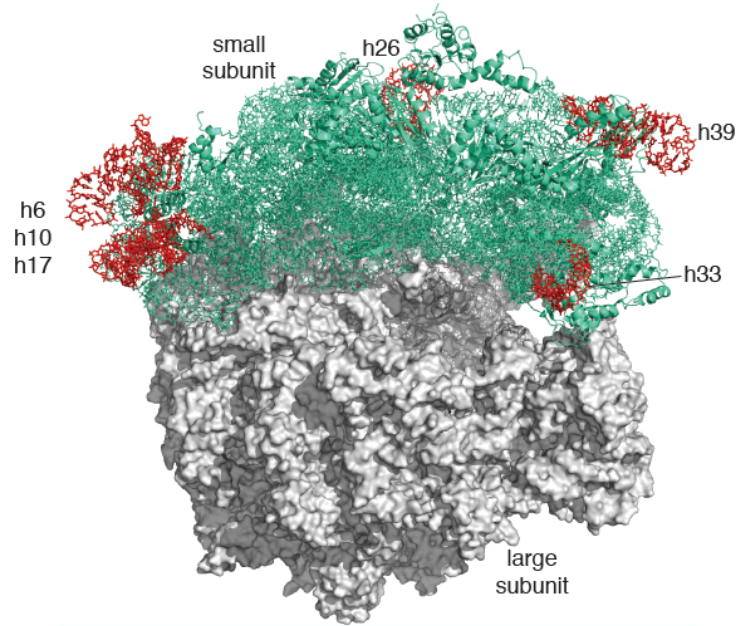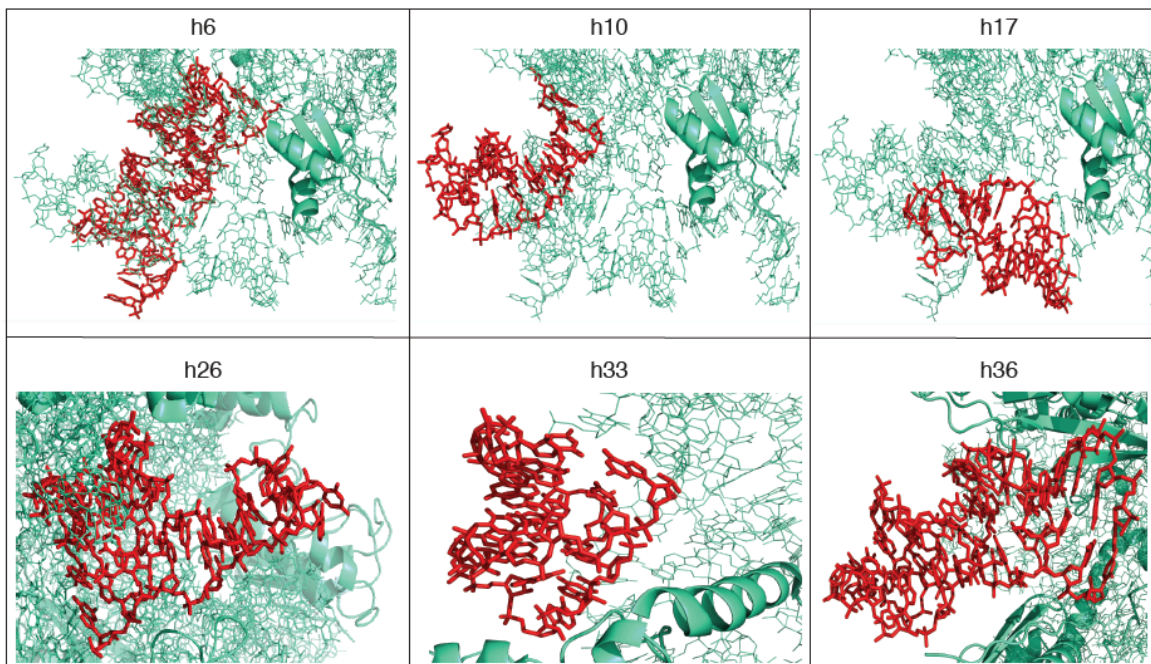

**Supplementary figure 4. Location of helices 6, 10, 17, 26, 33 and 36 in *E. coli* ribosome.**

Solvent-exposed helices 6, 10, 17, 26, 33 and 36 were chosen for engineering due of their lack of functional interactions with ribosomal proteins. Structure of the 70S ribosome with the large and the small subunits are shown (PDB IDs: 3OAR - 30S subunit and 3OAS – 50S subunit) and the locations of the six helices (red) on the 30S subunit (cyan) are highlighted.

**Supplementary Table 1. *Mycoplasma mycoides* genome editing efficiency using CRISPR/Cas9.**

Editing efficiency was calculated for select donor transformations (*M. mycoides* and *M. capricolum rrs*, single-site variant donors used individually or as a pool) from Supplementary Fig. 1. Twenty-four transformants from each transformation were screened.

| <b>Donor</b>                   | <b>Edited clones (%)</b> |
|--------------------------------|--------------------------|
| <i>M. mycoides rrs</i>         | 100                      |
| <i>M. capricolum rrs</i>       | 100                      |
| Pool (27 single-site variants) | 92                       |
| h6_MS2                         | 83                       |
| h10_MS2                        | 92                       |
| h17_MS2                        | 95                       |
| h26_MS2                        | 87                       |
| h39_MS2                        | 83                       |
| h6_HHRi                        | 92                       |
| h10_HHRi                       | 78                       |

All 24 positive clones for *rrs* replacement when *M. mycoides rrs* or *M. capricolum rrs* was used as a donor, were tested for the integrity of the edited *M. mycoides* genome. For the other donors, eight positive clones were subsequently tested for genome integrity. None of these *rrs* positive clones showed any genome-rearrangements decipherable by multiplex PCR (Supplementary Fig. 2).

**Supplementary Table 2. Sequences of primers used for *rrs* engineering.**

| Sequence                                                                             | Name       |
|--------------------------------------------------------------------------------------|------------|
| AAGCTTGCTCTGTCTCTTGTACAAGAGACAGAAGCTTGCTCACCTCAGTG<br>GCGAACGGGT                     | h6_SH_R    |
| AGCAAGCTTCTGTCTCTTGTACAAGAGACAGAGCAAGCTTCACCCCGTT<br>CGACTTGCAT                      | h6_SH_F    |
| CCTTGGGGCCTGTCTCTTGTACAAGAGACAGCCTTGGGGCGGTTCACTA<br>TGAGATGGGGA                     | h10_SH_R   |
| GCCCCAAGGCTGTCTCTTGTACAAGAGACAGGCCCAAGGGGTTCTTTT<br>GATCTTTTCTC                      | h10_SH_F   |
| AGTTAATACCTGTCTCTTGTACAAGAGACAGAGTTAATACGACTTTATCTT<br>GACAGTACC                     | h16_SH_R   |
| GTATTAACTCTGTCTCTTGTACAAGAGACAGGTATTAACTACTCTATTTTT<br>TCTTCCCTT                     | h16_SH_F   |
| CCCTTGAGGCTGTCTCTTGTACAAGAGACAGCCCTTGAGGCTCAGCGCT<br>GCAGCTAACGC                     | h26_SH_R   |
| CCTCAAGGGCTGTCTCTTGTACAAGAGACAGCCTCAAGGGCCCAACT<br>TAGTACTCATC                       | h26_SH_F   |
| CCACGGAAGCTGTCTCTTGTACAAGAGACAGCCACGGAAGTATAGTAGA<br>GGTTAACATTG                     | h33_SH_R   |
| CTCCGTGGCTGTCTCTTGTACAAGAGACAGCTTCCGTGGTATAGCTTTG<br>CACTGGATGT                      | h33_SH_F   |
| GGAGACTGCCCTGTCTCTTGTACAAGAGACAGGGAGACTGCCTGAGAAC<br>TCTAACGAGAC                     | h39_SH_R   |
| GGCAGTCTCCCTGTCTCTTGTACAAGAGACAGGGCAGTCTCCTGTTAGT<br>AACTAACGACA                     | h39_SH_F   |
| TGGAATCCAGGACGCGCCGAAGCGCGTCCGTCTATTTGGGACTCATCA<br>GCTGGATGTACCACCCCGTTTCTGACTTGCAT | h6_HHRi_F  |
| GTACATCCAGCTGATGAGTCCCAAATAGGACGGACGCGCTTCGGCGCGT<br>CCTGGATTCCACACCTCAGTGGCGAACGGGT | h6_HHRi_R  |
| TGGAATCCAGGACGCGCCGAAGCGCGTCCGTCTATTTGGGACTCATCA<br>GCTGGATGTACGGTTCTTTTCTGACTTTTCTC | h10_HHRi_F |
| GTACATCCAGCTGATGAGTCCCAAATAGGACGGACGCGCTTCGGCGCGT<br>CCTGGATTCCAGGTTCACTATGAGATGGGGA | h10_HHRi_R |
| TGGAATCCAGGACGCGCCGAAGCGCGTCCGTCTATTTGGGACTCATCA<br>GCTGGATGTACTCTATTTTTTCTTCCCTT    | h17_HHRi_F |
| GTACATCCAGCTGATGAGTCCCAAATAGGACGGACGCGCTTCGGCGCGT<br>CCTGGATTCCAGACTTTATCTTGACAGTACC | h17_HHRi_R |
| TGGAATCCAGGACGCGCCGAAGCGCGTCCGTCTATTTGGGACTCATCA<br>GCTGGATGTACCCCAACTTAGTACTCATC    | h26_HHRi_F |
| GTACATCCAGCTGATGAGTCCCAAATAGGACGGACGCGCTTCGGCGCGT<br>CCTGGATTCCACTCAGCGCTGCAGCTAACGC | h26_HHRi_R |
| TGGAATCCAGGACGCGCCGAAGCGCGTCCGTCTATTTGGGACTCATCA<br>GCTGGATGTACTATAGCTTTGCACTGGATGT  | h33_HHRi_F |
| GTACATCCAGCTGATGAGTCCCAAATAGGACGGACGCGCTTCGGCGCGT<br>CCTGGATTCCATATAGTAGAGGTTAACATTG | h33_HHRi_R |
| TGGAATCCAGGACGCGCCGAAGCGCGTCCGTCTATTTGGGACTCATCA<br>GCTGGATGTACTGTTAGTAACTAACGACAAG  | h39_HHRi_F |

|                                                                                      |            |
|--------------------------------------------------------------------------------------|------------|
| GTACATCCAGCTGATGAGTCCCAAATAGGACGGACGCGCTTCGGCGCGT<br>CCTGGATTCCATGAGAACTCTAACGAGACTG | h39_HHRi_R |
| ACTAGTAAAGATGGGTAATCCTCATCAAACTAGTCACCCCGTTCGACT<br>TGCAT                            | h6_MS2_F   |
| ACTAGTTTTGATGAGGATTACCCATCTTTACTAGTCACCTCAGTGGCGAA<br>CGGGT                          | h6_MS2_R   |
| ACTAGTAAAGATGGGTAATCCTCATCAAACTAGTGGTTCTTTTGATCTTT<br>TCTC                           | h10_MS2_F  |
| ACTAGTTTTGATGAGGATTACCCATCTTTACTAGTGGTTCACCTATGAGATG<br>GGGA                         | h10_MS2_R  |
| ACTAGTAAAGATGGGTAATCCTCATCAAACTAGTACTCTATTTTTCTTC<br>CCTT                            | h17_MS2_F  |
| ACTAGTTTTGATGAGGATTACCCATCTTTACTAGTGACTTTATCTTGACAG<br>TACC                          | h17_MS2_R  |
| ACTAGTAAAGATGGGTAATCCTCATCAAACTAGTCCCAACACTTAGTAC<br>TCATC                           | h26_MS2_F  |
| ACTAGTTTTGATGAGGATTACCCATCTTTACTAGTCTCAGCGCTGCAGCT<br>AACGC                          | h26_MS2_R  |
| ACTAGTAAAGATGGGTAATCCTCATCAAACTAGTTATAGCTTTGCACTG<br>GATGT                           | h33_MS2_F  |
| ACTAGTTTTGATGAGGATTACCCATCTTTACTAGTTATAGTAGAGGTTAAC<br>ATTG                          | h33_MS2_R  |
| ACTAGTAAAGATGGGTAATCCTCATCAAACTAGTTGTTAGTAACTAACGA<br>CAAG                           | h39_MS2_F  |
| ACTAGTTTTGATGAGGATTACCCATCTTTACTAGTTGAGAACTCTAACGAG<br>ACTG                          | h39_MS2_R  |
| GCCGCTAACATCAGGGAGCAAGCTCCCATCTGTCCGCTCGACTTGCATG<br>TATTAGGCATG                     | h6_Bs_F    |
| GTCGAGCGGACAGATGGGAGCTTGCTCCCTGATGTTAGCGGCGAACGG<br>GTGAGTAACACG                     | h6_Bs_R    |
| TTATCGCATGAGAAAAGATCAAAAGGTGGCTTCGGCTACCACTATGAGAT<br>GGGGATGCGG                     | h10_Bs_F   |
| GGTGGCTTCGGCTACCACTATGAGATGGGGATGCGG                                                 | h10_Bs_R   |
| TTGTAAGGGAAGAAAAGTACCGTTCGAATAGGGCGGTACCTTGACAGT<br>ACCTTACCAGA                      | h17_Bs_F   |
| GTACCGTTCGAATAGGGCGGTACCTTGACAGTACCTTACCAGA                                          | h17_Bs_R   |
| ACCTTAGAGTGCCCAACTGAATGCTGGCAACTAAGATCAAGGTTGCGT<br>TCGTTGCG                         | h39_Bs_F   |
| ATCTTAGTTGCCAGCATTAGTTGGGCACTCTAAGGTGACTGCTAGTGTA<br>AGCTAGA                         | h39_Bs_R   |
| GCCGCTCTTTACCGAAGTAAATCGCTCAACTTGCATGTATTAGGCATGCC                                   | h6_Cd_F    |
| GTTGAGCGATTTACTTCGGTAAAGAGCGGCGAACGGGTGAGTAACACGT<br>A                               | h6_Cd_R    |
| ATCTTATTATCGCATGAGAAAAGATCAAAAGGTGAGCCACTATGAGATGG<br>GGATGCGGCG                     | h10_Cd_F   |
| GGTGAGCCACTATGAGATGGGGATGCGG                                                         | h10_Cd_R   |
| TCTGTTGTAAGGGAAGAAAAGATAATGACCTTGACAGTACCTTACCAGA<br>AAGCCACGGC                      | h17_Cd_F   |
| GATAATGACCTTGACAGTACCTTACCAGA                                                        | h17_Cd_R   |



|                                                                        |              |
|------------------------------------------------------------------------|--------------|
| TCTCTAGAGTGCCCAACTTAATGATGGCAACTAAAGACAAGGGTTGCGTT<br>CGTTGCG          | h39_Cd_F     |
| TCTTTAGTTGCCATCATTAAAGTTGGGCACTCTAGAGAGACTGCTAGTGTA<br>AGCTAGA         | h39_Cd_R     |
| GCCACTCGTCAGCAAAGAAGCAAGCTTCTTCCTGTTACCGTTGACTTGC<br>ATGTATTAGGCATGCC  | h6_Ec_F      |
| GTCGAACGGTAACAGGAAGAAGCTTGCTTCTTTGCTGACGAGTGGCGAA<br>CGGGTGAGTAACACGTA | h6_Ec_R      |
| CATGAGAAAAGATCAAAAAGAGGGGGACCTTCGGGCCTCTTACTATGAGA<br>TGGGGATGCGG      | h10_Ec_F     |
| GAGGGGGACCTTCGGGCCTCTTACTATGAGATGGGGATGCGG                             | h10_Ec_R     |
| TTGTAAGGGAAGAAAAAGAGTAAAGTTAATACCTTTGCTCCTTGACAGTA<br>CCTTACCAGA       | h17_Ec_F     |
| GAGTAAAGTTAATACCTTTGCTCCTTGACAGTACCTTACCAGA                            | h17_Ec_R     |
| TCCTTTGAGTTCCCGGCCGGACCGCTGGCAACAAAGGACAAGGGTTGC<br>GTTGCGTTGCG        | h39_Ec_F     |
| TCCTTTGTTGCCAGCGGTCCGGCCGGGA ACTCAAAGGAGACTGCTAGTG<br>TAAGCTAGA        | h39_Ec_R     |
| GGTAAGACTAATTAAGATGGTAGTGAATATAAAATGTCTAAAAG                           | Cas9_donor_F |
| GAACAATCTATATTCAAAGATGTGTGACGATCTCTG                                   | Cas9_donor_R |

**Supplementary Table 3. Sequences of ultramers used for *rrs* engineering.**

T1 and T6 ultramers were used to generate gRNAs for replacing the native *rrs* with the *ura3* cassette while gRNAs resulting from T9 and T10 ultramers were used for replacing the *ura3* cassette with wild-type *rrs* or engineered *rrs*\*. Target sequences are indicated in red.

|       |                                                                                                                                  |
|-------|----------------------------------------------------------------------------------------------------------------------------------|
| F_T1  | TAATACGACTCACTATAGGTATCCGTACGGGAACGTGGTTTTAGAGCTAGAAATAGCAAGTTAAAATAAGGCTAGTCCGTTATCAACTTGAAAAAGTGGCACCGAGTCGGTGCTTTTTTT         |
| R_T1  | AAAAAAGCACCGACTCGGTGCCACTTTTTCAAGTTGATAACGGACTAGCCTTA<br>TTTTAACTTGCTATTTCTAGCTCTAAAACACAGTTCCTCGTACGGATACCTATAGT<br>GAGTCGTATTA |
| F_T6  | TAATACGACTCACTATAGCATACTGAGCATAATAAACGTTTTAGAGCTAGAAATA<br>GCAAGTTAAAATAAGGCTAGTCCGTTATCAACTTGAAAAAGTGGCACCGAGTCG<br>GTGCTTTTTTT |
| R_T6  | AAAAAAGCACCGACTCGGTGCCACTTTTTCAAGTTGATAACGGACTAGCCTTA<br>TTTTAACTTGCTATTTCTAGCTCTAAAACGTTTATTATGCTCAGTATGCTATAGTG<br>AGTCGTATTA  |
| F_T9  | TAATACGACTCACTATACATAGTTAAGCCAGCCCAACGTTTTAGAGCTAGAAATA<br>GCAAGTTAAAATAAGGCTAGTCCGTTATCAACTTGAAAAAGTGGCACCGAGTCG<br>GTGCTTTTTTT |
| R_T9  | AAAAAAGCACCGACTCGGTGCCACTTTTTCAAGTTGATAACGGACTAGCCTTA<br>TTTTAACTTGCTATTTCTAGCTCTAAAACGTTGGGCTGGCTTAACTATGTATAGT<br>GAGTCGTATTA  |
| F_T10 | TAATACGACTCACTATACACAGATGCGTAAGGAGGTGGTTTTAGAGCTAGAAAT<br>AGCAAGTTAAAATAAGGCTAGTCCGTTATCAACTTGAAAAAGTGGCACCGAGTC<br>GGTGCTTTTTTT |
| R_T10 | AAAAAAGCACCGACTCGGTGCCACTTTTTCAAGTTGATAACGGACTAGCCTTA<br>TTTTAACTTGCTATTTCTAGCTCTAAAACCACCTCCTTACGCATCTGTGTATAGT<br>GAGTCGTATTA  |

**Supplementary Table 4. Diagnostic primers used to confirm the integrity of the *M. mycoides* genome through multiplex PCR.**

When the genome is intact, seven bands, 204bp, 256bp, 301bp, 408bp, 515bp, 612bp and 724bp, are obtained after the diagnostic multiplex PCR.

| Sequence                 | Name     |
|--------------------------|----------|
| GTAGAACATGTTGCAGATAAG    | MPCR9-2F |
| TGATGGTGCATAACGTAATC     | MPCR9-2R |
| ATTTAGTTGCTGATTGAGTTTG   | MPCR9-3F |
| CTAGGACCAGTGGCTGC        | MPCR9-3R |
| AGTTGACTGAAATTCTCAGTC    | MPCR9-4F |
| AAGATCGTTTAGCTAAAGGAC    | MPCR9-4R |
| TGGTTATATAACTTGGAGTG     | MPCR9-5F |
| GCAGGTTTTCTCCTCTAC       | MPCR9-5R |
| CATGATTGATATGTTTAAAGATGC | MPCR9-6F |
| TGCAAAGACTAAAGTATATGTG   | MPCR9-6R |
| TTGATGTATCTCACTTATTTAGA  | MPCR9-7F |
| CAACAAGTAGAGATTTAAACAG   | MPCR9-7R |
| GCTTGTTCAACATTATAAGCTC   | MPCR9-8F |
| TTGATGGTGAAGTCTAATAACT   | MPCR9-8R |

**Supplementary Table 5. Primers used to confirm genome-editing event through multiplex PCR.**

In the presence of an editing event, 353bp and 474bp bands would be observed, while a ~1.8kb amplicon would be obtained if the *ura3* cassette is not replaced by *rrs*\*.

| Sequence                            | Name         |
|-------------------------------------|--------------|
| GCAGGTAGTCACGTCCTTCTTCGG            | FJ1-Diagn16S |
| GTCGCGGTGAATACGTTCTCGG              | RJ1-Diagn16S |
| GCTTGGTTTAAAATTGAATGACATCTAGCAGTAGC | FJ2-Diagn16S |
| AAATTAATTAATGTTTGAGGTGGAGATCATCATGG | RJ2-Diagn16S |

**Sequences of the heterologous 16S rRNA genes used to substitute the entire wild-type *M. mycoides* 16S rRNA gene**

*E. coli*

AGATAAGGAGGTGATCCAACCGCAGGTTCCCTACGGTTACCTTGTACGACTTCACCCCAGTCATGAATCACAAAG  
TGGTAAGCGCCCTCCCGAAGGTTAAGCTACCTACTTCTTTTGCAACCCACTCCCATGGTGTGACGGGCGGTGTGTAC  
AAGGCCCGGAACGTATTACCGTGGCATTCTGATCCACGATTACTAGCGATTCCGACTTCATGGAGTCGAGTTGCA  
GACTCCAATCCGGACTACGACGCACTTTATGAGGTCCGCTTGCTCTCGCGAGGTCGCTTCTCTTTGTATGCGCCATT  
GTAGCACGTGTGTAGCCCTGGTCGTAAGGGCCATGATGACTTGACGTCATCCCCACCTTCCTCCAGTTTATCACTGG  
CAGTCTCCTTTGAGTTCCCGGCCGACCGCTGGCAACAAAGGATAAGGGTTGCGCTCGTTGCGGGACTTAACCCAAC  
ATTTTACAACACGAGCTGACGACAGCCATGCAGCACCTGTCTCACGGTTCCCGAAGGCACATTCTCATCTCTGAAAA  
CTTCCGTGGATGTCAAGACCAGGTAAGGTTCTTCGCGTTGCATCGAATTAACCACATGCTCCACCGCTTGTGCGGG  
CCCCCGTCAATTCATTTGAGTTTTAACCTTGCGGCCGTACTIONCCCCAGGCGGTGACTTAACGCGTTAGCTCCGGAAG  
CCACGCCTCAAGGGCACAACCTCCAAGTCGACATCGTTTACGGCGTGGACTACCAGGGTATCTAATCCTGTTTGCTC  
CCCACGCTTTTCGACCTGAGCGTCAGTCTTCGTCCAGGGGGCCGCTTCGCCACCGGTATTCTCCAGATCTCTACG  
CATTTACCGCTACACCTGGAATTCTACCCCCCTCTACGAGACTCAAGCTTGCCAGTATCAGATGCAGTTCCAGGT  
TGAGCCCGGGGATTTACATCTGACTTAACAAACCGCTGCGTGCCTTTACGCCAGTAATTCGATTAACGCTTG  
CACCTCCGTATTACCGCGGCTGCTGGCACGGAGTTAGCCGGTGCTTCTTCTGCGGGTAACGTCAATGAGCAAAGGT  
ATTAACTTTACTCCCTTCCTCCCGCTGAAAGTACTTTACAACCCGAAGGCCTTCTTCATACACGCGGCATGGCTGC  
ATCAGGCTTGCGCCATTGTGCAATATTTCCCACTGCTGCCTCCCGTAGGAGTCTGGACCGTGTCTCAGTTCCAGTG  
TGGCTGGTCATCCTCTCAGACCAGCTAGGGATCGTCGCCTAGGTGAGCCGTTACCCACCTACTAGCTAATCCCATC  
TGGGCACATCCGATGGCAAGAGGCCCGAAGGTACCCCTCTTTGGTCTTGCGACGTTATGCGGTATTAGCTACCGTTT  
CCAGTAGTTATCCCCCTCCATCAGGCAGTTTCCAGACATTACTCACCCGTCCGCCACTCGTCAGCAAAGAAGCAAG  
CTTCTTCTGTTACCGTTCGACTTGCATGTGTTAGGCCTGCCGCCAGCGTTCAATCTGAGCCATGATCAAACCTCTTC  
AATTT

*Streptomyces scabiei*

AGAAAGGAGGTGATCCAGCCGCACCTTCCGGTACGGCTACCTTGTACGACTTCGTCCCAATCGCCAGTCCCACCTT  
CGACAGCTCCCTCCCTTACGGGTTGGGCCACCGGCTTCGGGTGTTACCGACTTTCGTGACGTGACGGGCGGTGTGTA  
CAAGGCCCGGAACGTATTACCGCAGCAATGCTGATCTGCGATTACTAGCAACTCCGACTTCATGGGGTCGAGTTG  
CAGACCCCAATCCGAAGTACGACAGGCTTTTTGAGATTGCTCCGCCTCACGGCTTCGACGCTCATTGTACCTGCCA  
TTGTAGCACGTGTGACGCCAAGACATAAGGGGCATGATGACTTGACGTCGTCCCCACCTTCCTCCAGTTGACCCC  
GGCAGTCTCCTGTGAGTCCCCATCACCCGAAGGGCATGCTGGCAACACAGAACAAGGGTTGCGCTCGTTGCGGGAC  
TTAACCCAACATCTCACGACACGAGCTGACGACAGCCATGCACCACCTGTACACCGACCACAAGGGGGCGACCATCT  
CTGGCCGTTTTCCGGTGTATGTCAAGCCTTGGTAAGGTTCTTCGCGTTGCGTTCGAATTAAGCCACATGCTCCGCTGCC  
TGTGCGGGCCCCGTCAATTCCTTTGAGTTTTAGCCTGCGGCCGTACTIONCCCCAGGCGGGGAACCTAATGCGTTAGCTG  
CGGCACCGACGACGTGGAATGTGCGCAACACCTAGTTCCCACCGTTTACGGCGTGGACTACCAGGGTATCTAATCCT  
GTTTCGCTCCCCACGCTTTCGCTCCTCAGCGTCAGTAATGGCCCAGAGATCCGCCTTCGCCACCGGTGTTCTCCTCTGA  
TATCTGCGCATTTACCGCTACACCAGGAATTCGATCTCCCCTACCACACTCTAGTCTGCCCGTATCGAATGCAGA  
CCCGGGGTTAAGCCCCGGGCTTTCACATCCGACGCGACAGACCGCTACGAGCTCTTTACGCCCAATAATTCGGAC  
AACGCTCGCGCCCTACGTATTACCGCGGCTGCTGGCACGTAGTTAGCCGGCGCTTCTTCTGCAGGTACCGTCACTTT  
CGCTTCTTCCCTGCTGAAAGAGGTTTACAACCCGAAGGCCGTCATCCCTCACGCGGCGTGCCTGCATCAGGCTTTCG  
CCCATTGTGCAATATTTCCCACTGCTGCCTCCCGTAGGAGTCTGGGCCGTGTCTCAGTCCCAGTGTGGCCGGTGC  
CTCTCAGGCCGGCTACCCGTCGTCGCCTTGGTGGAGCCGTTACCTCACCAACAAGCTGATAGGCCGCGGGCTCATCCT  
TCACCGCCGAGCTTTCACACTCATCGGATGCCCGAGAGTGTGCTATCCGGTATTAGACCCGTTTTCCAGGGCTTG  
TCCCAGAGTGAAGGGCAGATTGCCACGTGTTACTCACCCGTTGCCACTAATCCCCACCGAAGTGGTTTCATCGTTC  
GACTTGCATGTGTTAAGCACGCCCGCCAGCGTTCGTCTGAGCCAGGATCAAACCTCTCCGTGAATGTTT

*Bacillus subtilis*

AGAAAGGAGGTGATCCAGCCGCACCTTCCGATACGGCTACCTTGTTACGACTTCACCCCAATCATCTGTCCCACCTT  
CGGCGGCTGGCTCCTAAAAGGTTACCTCACCGACTTCGGGTGTTACAAACTCTCGTGGTGTGACGGGCGGTGTGTAC  
AAGGCCCGGGAACGTATTCACCGCGGCATGCTGATCCGCGATTACTAGCGATTCCAGCTTCACGCAGTCGAGTTGCA  
GACTGCGATCCGAACCTGAGAACAGATTTGTGGGATTGGCTTAACCTCGCGGTTTTCGCTGCCCTTTGTTCTGTCCATT  
GTAGCACGTGTGTAGCCCAGGTCATAAGGGGCATGATGATTTGACGTCATCCCCACCTTCCTCCGGTTTTGTCACCGG  
CAGTCACCTTAGAGTGCCCAACTGAATGCTGGCAACTAAGATCAAGGGTTGCGCTCGTTGCGGGACTTAACCCAACA  
TCTCACGACACGAGCTGACGACAACCATGCACCACCTGTCACCTCGCCCCGAAGGGGACGTCCATCTCTAGGATT  
GTCAGAGGATGTCAAGACCTGGTAAGGTTCTTCGCGTTGCTTCGAATTAACCACATGCTCCACCGCTTGTGCGGGC  
CCCCGTCAATTCCTTTGAGTTTCAGTCTTGCGACCGTACTCCCCAGGCGGAGTGCTTAATGCGTTAGCTGCAGCACT  
AAGGGGCGGAAACCCCTAACACTTAGCACTCATCGTTTACGGCGTGGACTACCAGGGTATCTAATCCTGTTGCGCTC  
CCCACGCTTTGCGCTCCTCAGCGTCAGTTACAGACCAGAGAGTCGCTTCGCCACTGGTGTTCCTCCACATCTCTACG  
CATTTACCGCTACACGTGGAATTCACCTCTCCTCTTCTGCACTCAAGTTCCCCAGTTTCCAATGACCCTCCCCGGT  
TGAGCCGGGGCTTTCACATCAGACTTAAGAAACCGCTGCGAGCCCTTACGCCAATAATTCCGGACAACGCTTG  
CCACCTACGTATTACCGCGGCTGCTGGCACGTAGTTAGCCGTGGCTTTCTGGTTAGGTACCGTCAAGGTACCGCCCT  
ATTCGAACGGTACTTGTCTTCCCTAACACAGAGCTTTACGATCCGAAAACCTTCATCACTCACGCGGCGTTGCTC  
CGTCAGACTTTTCGTCCATTGCGGAAGATTCCCTACTGCTGCCTCCCGTAGGAGTCTGGGCGGTGTCTCAGTCCCAGT  
GTGGCCGATCACCTCTCAGGTCGGCTACGCATCGTCGCTTGGTGAGCCGTTACCTCACCAACTAGCTAATGCGCC  
GCGGGTCCATCTGTAAGTGGTAGCCGAAGCCACCTTTTATGTTTGAACCATGCGGTTCAAACAACCATCCGGTATTA  
GCCCCGTTTTCCCGGAGTTATCCCAGTCTTACAGGCAGGTTACCCACGTGTTACTCACCCGTCCGCCGCTAACATCA  
GGGAGCAAGCTCCCATCTGTCCGCTCGACTTGATGTATTAGGCACGCCGCCAGCGTTTCGTCTGAGCCAGGATCAA  
ACTCTCCGATAAA

*Clostridium acetobutylicum*

AGAAAGGAGGTGATCCAGCCGCAGGTTCTCCTACGGCTACCTTGTTACGACTTCACCCCAATTATCAACCCACCTT  
CGACCGCTGGTTCAAAAGGTTACCTCACGGGCTTCGGGTGTTGCCGACTCTCATGGTGTGACGGGCGGTGTGTACA  
AGACCCGGGAACGTATTCACCGCGACATTCTGATTGCGGATTACTAGCAACTCCGGCTTCATGTAGGCGGATTTTCAG  
CCTACAATCCGAACCTGGGATGGGGTTTTGAGTTTTGCTCCACCTTGCGGTATTGCATCTTTTTGTCCCCACCATTGT  
AGCACGTGTGTAGCCCTAGACATAAGGGGCATGATGATTTGACGTCATCCCCACCTTCCTCCCGGTTAACCCGGGCA  
GTCTCACTAGAGTGCTCAACTAAATGTTAGCAACTAATGATAAGGGTTGCGCTCGTTGCGGGACTTAACCCAACATC  
TCACGACACGAGCTGACGACAACCATGCACCACCTGTCATCCTGTCCCCGAAGGGACTTCATCCATTACGGACTAAT  
TCAGGAGATGTCAAGTCTAGGTAAGGTTCTTCGCGTTGCTTCGAATTAACCACATGCTCCGCTGCTTGTGCGGGTC  
CCCGTCAATTCCTTTGAGTTTTAATCTTGCAGCCGACTTCCCAGGCGGAATACTTATTGTGTTAACTGCGGCACAG  
AAGGAGTCGATACCTCCTACACCTAGTATTTCATCGTTTACGGCGTGGACTACCAGGGTATCTAATCCTGTTTGTCC  
CCACGCTTTCATGCCTCAGCGTCAGTTACAGTCCAGAAGGCCGCTTCGCCACTGGTATTCTTCCTAATCTCTACGC  
ATTTACCGCTACACTAGGAATTCTGCCTTCTCCTGCACTCCAGACATCCAGTTTGAAATGCAGCCCCCAAGTT  
AAGCCCGGGGATTTACATCTCACTTAAATATCCGCCTACACATCCTTTACGCCAGTAAATCCGGACAACGCTTGC  
CACCTACGTATTACCGCGGCTGCTGGCACGTAGTTAGCCGTGGCTTCCTCCTATGGTACCGTCATTATCGTCCCATA  
AGACAGAGTTTTACGATCCGAAGACCTTCATCACTCACGCGGCGTTGCTGCATCAGGGTTTTCCCCATTGTGCAATA  
TTCCCCACTGCTGCCTCCCGTAGGAGTCTGGACCGTGTCTCAGTTCCAATGTGGCCGATCACCTCTCAGGTCGGCT  
ACGCATCGAAGCCTTGGTGAGCCGTTACCTCACCAACAAGCTAATGCGCCGCGGGTCCATCTCATAGCGAATAAATC  
CTTTGGCTCAAGAATCATGCGATTCTCGAGTATTATGCGGTATTAATCTTCTTTGAAAGGCTATTCCCCACTATG  
AGGTAGGTTACCCACGTGTTACTCACCCGTCCGCCGCTGGGAACCGAAGTTCCCCGCTCGACTTGATGTGTTAAGC  
ACGCCGCCAGCGTTTCGTCTGAGCCAGGATCAAACCTCTCAATTT

*Acholeplasma laidlawii*

AGAAAGGAGGTGATCCATCCCCACGTTCCCGTAGGGATACCTTGTTACGACTTAACCCCAATCATGGACCCTACCTT  
AGACGGCTCCCTCCCTTTTCGGGTTAGGCCACCGGCGTTGGGTATTGCCCACTTTTCGTGGTTTTGACGGGCGGTGTGTA  
CAAACCCCGAGAACGTATTCACCGCAACATGCTGATTTGCGATTACTAGCGATTCCGACTTCATGGAGTTCGAGTTGC  
AGACTCCAATCCGAACGAGACTGTTTTTGTGAGTTTTCGCTCCAGGTCACCCTATCGCTTCTCTTTGTTCCAGCCAT  
TGTATCACGTTTTGTAGCCAGGTCATAAGGGGCATGATGATTTGACGTCATCCCCACCTTCTCCAATTTATCACTG  
GCAGTCTCGCTAGAGTCCCCAACTTAATGATGGTAAGTACTAGCAATAAGGGTTGCGCTCGTTGCGGGACTTAACCCAAC  
ATCTCACGACACGAGCTGACGACAACCGTGCACCACCTGTACATCTGTTAGCCTCCGAACCTATTTCTAAGCCTTTG  
CAGAGTATGTCAAGACCTGGTAAGGTTTTTCGTGTATCTTCGAATTAACAACATGATCCACCGCTTGTGCGGGGTC  
CCGTCAATTCCTTTGAGTTTCATACTTGCCTACGTAAGTACTACTCAGGCGGAGAACTTAATGCGTTAACTGCAGCACTGA  
CCTTTTGGCCAACACTTAGTTCTCATCGTTTACGGCGTGGACTACCAGGGTATCTAATCCTGTTTGTCTCCCCACGCT  
TTCGTGCATCAGTGTGAGTATAGACCCAGCAAGCCGCTTTCGCCACTGGTGTTCCTCCATATATTTACGCATTTTAC  
CGCTACACATGGAATTCACCTTGCCTCTGTCTCACTCTAGTTATATAGTTTTTCATAGCCTCACAGCGTTAAGCACTG  
CACTTACACCACAACTTTTATAACCACCTACGCACCCTTTACGCCAGTAAATCCGGATAACGCTCGCCCCCTATG  
TATTACCGCGGCTGCTGGCACATAGTTAGCCGGGGCTTATTCATATGGTACCGTCAATTTTTAATTTTTCTTCCCAT  
ATAAAAGAAGTTTACATACCGAAGTACTTTCGTGTTTACGCGGCGTTGCTCGGTGAGGGTTTTCCCCATTGCCGAAA  
ATTCCCTACTGCTGCCTCCCGTAGGAGTTTTGGGCCGTTCTCAGTCCCAATGTGGCCGGTAGACCTCTCAGTCCGGCT  
ACGCATCATCGTCTTGGTAGGCTTTTTACCCACCAACTAACTAATGCGCCGAGACCCCTCTTAAACCGATAAATCT  
TTAAATGTGTTTTTTTTCATGCACACATCCTATCCAGTATTAGCTCCAGTTTTCCCGAGTTATCCTCGAGTTAAAGGT  
AGGTTATCTACGTGTTACTCACCCGTTCCGCACTAAGCATCCGAAGATGCTTCGTTGACTTGCATGTATTAGGCAC  
GCCGCCAGCGTTCATCCTGAGCCAGGATCAAACCTCTCCATATA

*Spiroplasma taiwanense*

AAAATGAGAGTTTGATCCTGGCTCAGGATGAACGCTGGCGGCATGCCTAATACATGCAAGTCGAACGGGGTGCTTGC  
ACCCAGTGGCGAACGGGTGAGTAACACGTATCTAATCTACCTTTTAGTGGGGGATAACAGTTGGAAACGACTGCTAA  
TACCGCATAACGACACCATTATGGCATCAGAAGGTGTTAAAAGGCCCGTTTTGGGTGCTAGAAAGATGAGGATGCGGGC  
TATTAGTTAGTAGGTGAGGTAATTGCTCACCTAGGCGATGATACGTAGCCGAACGAGAGGTTGATCGGCCACATTG  
GGACTGAGATACGGCCAGACTCCTACGGGAGGCAGCAGTAGGGAATTTTTACAATGGACGAAAGTCTGATGAAGC  
AATGCCGCGTGAGTGATGACGGTCTTCGGATTGTAAAGCTCTGTTGTAAGGGAAGAAATGCTAGAAAAGGAAATGTT  
TTTAGTTTTGACGGTACCTTACCAGAAAGCCACGGCTAACTATGTGCCAGCCGCCGCGGTAATACATAGGTGGCAAGC  
GTTATCCGGATTTATTGGGCGTATAGGGTGCCTAGGCGGTTAGTTAAGTTTTGAGGTTAAAGCCCGGAGCTCAACTCC  
GGTTCGCCTTGAAAAGTGGCTAACTAGAATGCAGGAGAGGTAGATGGAATTCATGTGTAGCGGTGAAATGCGTAGA  
TATATGGAGGAACACCAGTGGCGTAGGCGGCTACTGGCCTGTGATTGACGCTGAGGCACGAAAGCGTGGGGAGCAA  
ATAGGATTAGATACCCTAGTAGTCCACGCCGTAACGTTGAGTACTAAGTGTGCGCATTGTTGTCGGTGCTGCAGCTA  
ACGCATTAAGTACTCCGCTGAGTAGTATGCTCGCAAGAGTGAAACTCAAAGGAATTGACGGGGACCCGCACAAGTG  
GTGGAGCATGTGGTTTAATTCGAAGCAACGCGAAGAACCTTACCAGGGCTTGACATCCAGTGCAAAGCTACAGAGAT  
GTAGTGGAGGCTAACATTGAGACAGGTGGTGCATGGTTGTGCTCAGCTCGTGCCGTGAGGTGTTGGGTTAAGTCCCG  
CAACGAGCGCAACCCCTATCATTAGTTACTAACATTCAGTTGAGGACTCTAATGAGACTGCTAGTGTAAAGCTAGAGG  
AAGGTGGGGATGACGTCAAATCATCATGCCCTTATGTCTGGGCTACACACGTGCTACAATGGCTGATACAAAGAG  
TTGCAATCCTGCGAGGGGGAGCTAATCTCAAAAAGTCAGTCTCAGTTCCGGATTGAAGTCTGCAACTCGACTTCATGA  
AGCCGGAATCACTAGTAATCGCGAATCAGCAACGTCGCGGTGAATACGTTCTCGGGTCTTGTACACACCGCCCGTCA  
CACCATGAGAGTTGGTAATACCAGAAGCACGTATCTTAACCGTAAGGAGGGAGCGTACCAAGGTAGGATTAGCGATT  
AGGGTGAAGTCGTAACAAGGTATCCGTACGGGAACGTGCGGATGGATCACCTCCTTTCT

*Mycoplasma capricolum*

AGAAAGGAGGTGATCCATCCGCACGTTCCCGTACGGATACCTTGTTACGACTTCACCCCAATCGCTAGTCCTACCTT  
GGGAAGCGCTCTCCAAATGGTTAAGCTACCTACTTCTGGTATTACCAACTCTCATGGTGTGACGGGCGGTGTGTACA

AGACCCGAGAACGTATTCACCGCGACATAGCTGATTTCGCGATTACTAGTGATTCCGGCTTCATGAAGTCGAGTTGCA  
GACTTCAATCCGAAGTGGACTGGTTTTTTGAGATTAGCTCCCCCTTACAGGATTGCAACTCTTTGTACCAGCCATT  
GTAGCACGTGTGTAGCCCAGGACATAAGGGGCATGATGATTTGACGTCATCCCCACCTTCCTCTAGCTTACACTAGC  
AGTCTCGTTAGAGTTCTCAACTTAATGTTAGTAACATAACGACAAGGGTTGCGTTTCGTTGCGGGACTTAACCCAACAC  
CTCACGGCACGAAGTACGACACAACCATGCACCACCTGTCTCAATGTTAACCTCTACTATATCTCTATAGCTTTGCAC  
TGGATGTCAAGCCCTGGTAAGGTTCTTCGTGTTGCTTCGAATTAACCACATGCTCCACCCTTGTGCGGGTCCCCG  
TCAATTCCTTTGAGTTTCACTCTTGCAGCATACTACTCAGGCGGAGTACTTAATGCGTTAGCTGCAGCGCTGAGTT  
ACCCCAACTTAGTACTCATCGTTTACGGCGTGGACTACTAGGGTATCTAATCCTATTTGCTCCCCACGCTTTTCGT  
GCCTCAGCGTCAATAACAAGCCAGTAAGCCGCTTTTCGCCACAGGTGTTCTTCCATATATCTACGCATTTACCCGCTA  
CACATGGAATTCGCTTACCTCTCTTGCATTCTAGTAAAACAGTCTTCAAGGCGAACCCGAGTTGAGCTCCGGACTT  
TAACCTCAAACCTTGCAAAACCGCTACGCACCCTATACGCCCAATAAATCCGGATAACGCTTGCACCTATGTATTA  
CCGCGGGCTGCTGGCACATAGTTAGCCGTGGCTTTCTGGTAAGGTACTGTCAAGATAAAGTCATTTTCTACTCTATTT  
TTTTCTTCCCTTACAACAGAGCTTTACAACCCGAAGGCCGTCACTACTCACGCGGCATTGCTTCATCAGACTTTTCGTC  
CATTGTGAAAAATTCCCTACTGCTGCCTCCCGTAGGAGTCTGGGCCGTATCTCAGTCCCAATGTGGCCGATCAACCT  
CTCAGTTCCGGCTACGTATCATCGCCTAGGTGGGCTATTATCTCACCTACTAGCTAATACGCCGCATCCCCATCTCAT  
AGTGAACCAAACGGTTCTTTTTCATGCTTTTCTCATGCGATAATAAGATCTACATGCGGTATTATCTTTTCGTTTCCAAA  
AGTTATCCCCCGCTATAAGGTAGGTTAGATACGTGTTACTCACCCGTTCCGCACTGAGGTGCAAGCACCCCCGTTCCG  
ACTTGCATGTATTAGGCATGCCGCCAGCGTTTATCTGAGCCAGGATCAAACCTCTCATT

*Mesoplasma florum*

AGAAAGGAGGTGATCCATCCGCACGTTCCCGTACGGATACCTTGTTACGACTTCACCCCAATCGCTAGTCCTACCTT  
GGGACGCGCCTTCTTACGGTTAGGAAACGTACTTCTGGTATTACCAACTCTCGTGGTTTTGACGGGCGGTGTGTACA  
AGACCCGAGAACGTATTCACCGCGACATAGCTGATTTCGCGATTACTAGTGATTCCGGCTTCATGAAGTCGAGTTGCA  
GACTTCAATCCGAAGTGGACTGGTTTTTTGAGATTAGCTCCCCCTCGCGAGATTGCGACTCTTTGTATCGGCCATT  
GTAGCACGTGTGTAGCCCAGGACATAAGGGGCATGATGATTTGACGTCATCCCCACCTTCCTCTAGCTTACACTAGC  
AGTCTCGTTAGAGTCTCAACTTAATGTTAGTAACATAACGACAAGGGTTGCGTTTCGTTGCGGGACTTAACCCAACAC  
CTCACGGCACGAAGTACGACACAACCATGCACCACCTGTATCAATGTTAACCTCCACTACATCTCTGTAGCTTTGCAC  
TGTATGTCAAGCCCTGGTAAGGTTCTTCGTGTTGCTTCGAATTAACCACATGCTCCACCCTTGTGCGGGTCCCCG  
TCAATTCCTTTGAGTTTCACTCTTGCAGCATACTACTCAGGCGGAGTACTTAATGCGTTAGCTGCAGCACTGAGGT  
AATCCCAATACTTAGTACTCAACGTTTACGGCGTGGACTACTAGGGTATCTAATCCTATTTGCTCCCCACGCTTTC  
GTGCCTCAGCGTCAATAATCAGCCAGTAAGCCGCTTTTCGCCACTGGTGTCTTCCATATATCTACGCATTTTACCGC  
TACACATGGAATTCGCTTACCTCTCTGATATTCTAGTCCCGCAGTTTTTCAAGGCGAACCCGAGTTGAGCTCCGGGC  
TTTAACCTCAAACCTTGCGAAACCGCTACGCACCCTATACGCCCAATAAATCCGGATAACGCTTGCACCTATGTAT  
TACCGGGCTGCTGGCACATAGTTAGCCGTGGCTTTCTGGTAAGGTACCGTCAAGATAAGAGCATTTCTCTCTAT  
GTTTTCTTCCCTTACAACAGAGCTTTACAACCCGAAGGCCGTCACTACTCACGCGGCATTGCTTCATCAGACTTTTCG  
TCCATTGTGAAAAATTCCCTACTGCTGCCTCCCGTAGGAGTCTGGGCCGTATCTCAGTCCCAATGTGGCCGATCAAC  
CTCTCAGTTCCGGCTACGTATCATCGCCTAGGTGGGCTTTACCCCGCTACTAGCTAATACGCCGCATCCTCATCTT  
CTAGTGATCCAAACGGATCTTTGAATGTTTTTCTCATGCGATAATAACATCCACATGCGGTATTACCTTTTCGTTTCCA  
AAAGTTATCCCCCGCTAGAAGGTAGATTAGATACGTGTTACTCACCCGTTCCGCACTGAGGTGCAAGCACCTCCGTT  
CGACTTGCATGTATTAGGCATGCCGCCAGCGTTTATCTGAGCCAGGATCAAACCTCTCATT

*Chloroflexus aggregans*

AGAAAGGAGGTGATCCAGCCGCACCTTCCGGTACGGCTACCTTGTTACGACTTCGTTCCAGTCGCGGCTCCTGCCCT  
CGGCCGCTGCCTCCCCTGACGGGGTTAGCGCACGGACTTCAAGCATTAGCCACTCCCATGACGTGACGGGCGGTGTG  
TACAAGGCCCGGAACGTATTCACCGGCCATGGCTGATACGCGTTACTAGCAACTCCGCTTACAGGGGGCGAGT  
TGCAGCCCCGATCTGCACTGAGACCAGTTTTGGCGATTAGCGCCGCTTGCGGCGTGGCAACGCATTGTCGTGGCC  
ATTGTAGCGTGTGTGTCGCCCGGACGTCAGGGCCATGCTGACTTGACGTCATCCGCGCCTTCTCCGCGGTCTCG  
GCGGCAGTCTCGGTAGACACCGGTAACCTACCGACGCGGGTTGCGCTCGTTGCGGGACTGAACCCAACATCTCACGAC

ACGAGCTGACGACAGCCATGCAGCACCTGTGACGCACCCTCAAAGGCCGCGCTGTTTCCAGCACCTGCAGCGTCATG  
TCAAGCCCGGGTAAGGTTCTTCGGGTTGCGTCGAATTAACCACACGCTCCGCTGCTTGTGCGGGCCCCCGTCAATT  
CCTTTGAGTTTTAAGCTTTCGCTCGTAGTCCCCAGGCGGCCGCTTACCGCGTTAGCTAAGGCACCCGGCACGCTCA  
CGCGCGCCAAACGCCGAGCCGGCATCGTTTTACGGCGTGGACTACCCGGGTATCTAATCCGGTTTTGCTCCCCACGCGG  
TCGCGCCGACGCGTCAGGTCGAGCCCAGGTGGCCGACTGCTCCACC GGCGTTCTCCGGATCTCTACGCATTTACC  
GCTCCACCCGGAATTCACCACCCTCTGCTCGCCTCCAGCCTGCTCGTATCGGCGCGCCTCGCCCCGTTAAGCGGGG  
CGCTTTCAGCGCCGACGCAGCAGACC GCCTCCGCGCCCTTTACGCCCAGTAACTCCGGACAACGCTTGCCCCCTCTG  
TCTTACCGCGGCTGCTGGCACAGAGTTAGCCGGGGCTGCTTCTGGTGGTACC GT CAGTCTCGTCCCACCCGAAAGGA  
GTTTACAACCCGAAGGCCGTCGTCCTCCACGCGGGCGTTGCTCCCTCAGGCGTGCGCCATTGGGGAAAATTCCTTGC  
TGCTGCCTCCCGTAGGAGTCTGGGCCGTTGTCGCAGTCCCAGTCTGCCCGGCCGTCCTCTCAGACCCGGGTACCCGTC  
GTGGCTTGGTGCGCCGTTACCACACCAACTACCTGATGGGCCGAGGCCCGTCCCGGAGCGCCGTATGGCTTTCCTC  
CGTAGAGCGTATGCGGGATTGTCCCGTCTTTCGACGGGGTATCCCCACTCCGGGGGTGGTGACCCACGTGTTCCCTC  
AGCCGTTCCGCACGCAGCCGGCACTTGGCCGCTGCGTTCGACTTGCATGCATTAGGCACGCCGCCAGCGTTTCGTCTC  
GAGCCAGGATCAAACCTCTCATTTTT

*Deinococcus radiodurans*

AGAAAGGAGGTGATCCAACCGCACCTTCCGGTACAGTTACCTTGTTACGACTTCACCCAGTCATAAACCACAGTCT  
AGACGCCTGCCGTTAAGCTCCCGGCGGTTTTCAACTGCAATCTACTCCCATGGTGTGACGGGCGGTGTGTACAAGGCC  
CGGGAACGTATTACCGCGGTATGCTGACCCGCGATTACTAGCGATTCCAACCTCACGGAGTCGAGTTGCAGACTCC  
GATCTGAACTGGGGATAGTTTTAGCGATTTCGCTTACCCTCGCGGGTTTTGCTGCGCGTTGTCTACCATTGTAGCA  
CGTGTGTGCGCCAGGACGTAAGGACCATGCTGACTAGACGTCATCCCCGCCTTCTCCTACTTTTCATAGGCAGTCCC  
TCTAGAGTGTCCAACCTGAATGCTGACAACCTAAAGGCAAGGGTTGCGCTCGTTGCGGGACTTAACCCAACATCTCACG  
ACACGAGCTGACGACAGCCATGCAGCACCTGTGTCTAGGTTCCCCGAAGGGCACCTCTGCATCTCTGCAAAGTTCCT  
AGCATGTCAAGACCTGGTAAGGTTCTTCGCGTTGCTTTCGAATTAACCACATGCTCCACC GCTTGTGCGGGCCCCCG  
TCAATTCCTTTGAGTTTTAACCTTTCGCGCCGTA CTTCCCAGGCGGTACGTTTATCGCGTTAGCTTCGCCAAGCACAG  
CATCCTGCGCTTAGCCAACGTACATCGTTTTAGGGTGTGGACTACCCGGGTATCTAATCCGGTTTTGCTCCCCACACTT  
TCGCGCCTCAGCGTCACCTTCTGTCCAGTAACTTGCCTTTCGCCATTGGTGTTCCTCCTGGTATCTACGCATTTACC  
GCTACACCAGGAATTCAGTTACCTCTCCAGAGGTCAAGAAATCCAGTATCCAGTCCATCCCCGAGGTTGAGCCCCG  
GTCTTTAAAACCAGACTTAAATTTCCGCCTACACGCCCTTTACGCCCAGTGATTCCGGGTAACGCTTGCACCCTCCG  
TATTACCGCGGCTGCTGGCACGGAGTTAGCCGGTGTACTTACTCTGGTACCGTCATCTGCCCTAAGGCTCTTTTCGTC  
CCAGATTACAGAGTTTTACGATCCGAAAACCTTCATCCCTCACGCGGCGTCGCTCCATCAGGCTTGCGCCATTGTGG  
AAGATTCTAACTGCTGCCTCCCGTAGGAGTGGGACCCGTTGCTCAGTGCCCCTGTGGCCGGCCACCCTCTCAGGCC  
GGCTATCCGTCGTCGCCTTGGTAGGCCTTTACCCACCAACCAGCTGATGGAACGCAACCCCATCCAGAAGCGATAA  
ATCTTTAGTGATGCACCACGGTGCATCACCATCACGTATTAGCGGACCTTTTCGGCCAGTTATTTCGTGACTTCTGG  
GTAGGTCAGTTACGTGTTACTCACCCGTGCGCCACTCGGTCCGAAGACCGCGTTCGACTTGCATGTCTTAAGCACGC  
CGCCAGCGTTACCCTGAGCCAGGATCAAACCTCTCCATAAA
